# Supplementary material
Source: PubMed Central journal article supplement (PMC10119881)
Supplement: mmc1.pdf [file mmc1.pdf]

**Table 2. List of speakers**

| <b>Speaker</b>           | <b>Background</b>                                                                                                                                                                                     |
|--------------------------|-------------------------------------------------------------------------------------------------------------------------------------------------------------------------------------------------------|
| Professor Maria Bryant   | Professor of Public Health Nutrition at the University of York. Interest in the field of diet and obesity especially in early years and childhood.                                                    |
| Professor Giles Yeo      | Professor of Molecular Neuroendocrinology at the MRC Metabolic Diseases Unit. Interest in brain control of body weight and the genetics of obesity.                                                   |
| Dr Emma Farrell          | Senior Interdisciplinary Researcher at the University College Dublin. Interest in understanding the lived experience of people living with obesity as well as people with mental health difficulties. |
| Professor Jane Ogden     | Professor of Health Psychology at the University of Surrey. Interest in eating behaviour, weight management and obesity management.                                                                   |
| Dr Helen Parretti        | GP and NIHR Academic Clinical Lecturer at the University of Birmingham. Interest in weight management and obesity.                                                                                    |
| Ms Sarah Le Brocq        | Director at 'All About Obesity' organisation.                                                                                                                                                         |
| Professor Emma Frew      | Professor in Health Economics at the University of Birmingham. Interest in the Economics of Obesity.                                                                                                  |
| Mr Patrick McGinley      | Head of Costing and Service Line Reporting at Maidstone & Tunbridge Wells NHS Trust.                                                                                                                  |
| Mr Stephen Bevan         | Head of HR research development at the Institute of Employment Studies. Interest in workforce health and wellbeing                                                                                    |
| Professor Blakemore      | Professor of Human Genomics at Brunel University London. Interest in the role of genetic variation in obesity and diabetes among others.                                                              |
| Dr Adrian Brown          | Senior Research Fellow and Lecturer in Nutrition and Dietetics in the Centre of Obesity Research at University College London. Interest in obesity, bariatric surgery and weight stigma among others. |
| Professor Jennifer Logue | Honorary Professor in Metabolic Medicine at Lancaster University. Interest in the treatment of obesity and related metabolic disease.                                                                 |
| Professor Vinod Menon    | Honorary Associate Clinical Professor at University of Warwick. Interest in bariatric/metabolic surgery.                                                                                              |
| Ms Nadya Isack           | Patient Advocate for people living with obesity, Obesity Empowerment Network.                                                                                                                         |
| Professor Michael Lean   | Professor and Chair of Human Nutrition at University of Glasgow. Interest in the molecular, clinical and public health aspects of Human Nutrition.                                                    |
| Mrs Audrey Roberts       | Patient Advocate and Vice President of ECPO (European Coalition for People Living with Obesity)                                                                                                       |
| Mr Chris McEwan          | Deputy Leader Labour Group in Darlington Borough Council and active member of Obesity Policy Engagement Network (OPEN)                                                                                |

|                                   |                                                                                                                                                                                                                                                  |
|-----------------------------------|--------------------------------------------------------------------------------------------------------------------------------------------------------------------------------------------------------------------------------------------------|
| Professor Paul Gately             | Professor of Obesity and Exercise at Leeds Beckett University. Interest in obesity and especially childhood obesity.                                                                                                                             |
| Professor Alexander Dimitri Miras | Professor of Medicine at Ulster University and visiting Professor at Imperial College London. Interest in the mechanisms of action of interventions for obesity and diabetes, focusing on pharmacotherapy, medical devices, and obesity surgery. |
